# Supplementary material for: Repurposing endogenous type I CRISPR-Cas systems for programmable gene repression
Source: PubMed Central journal article supplement — Nucleic Acids Res. 2014 Oct 17;43(1):674–81. doi: 10.1093/nar/gku971 (PMC4288209; doi:10.1093/nar/gku971), 2014-10-17
Supplement: supp_gku971_nar-02103-h-2014-File006.pdf [file supp_gku971_nar-02103-h-2014-File006.pdf]

## **SUPPLEMENTARY INFORMATION**

### **Repurposing endogenous Type I CRISPR-Cas systems for programmable gene repression**

Michelle L. Luo, Adam S. Mullis, Ryan T. Leenay, and Chase L. Beisel

#### **TABLE OF CONTENTS**

|                               |     |    |
|-------------------------------|-----|----|
| Supplementary Figures S1 – S5 | ... | 1  |
| Supplementary Tables S1 – S5  | ... | 6  |
| Supplementary References      | ... | 14 |

## SUPPLEMENTARY FIGURES

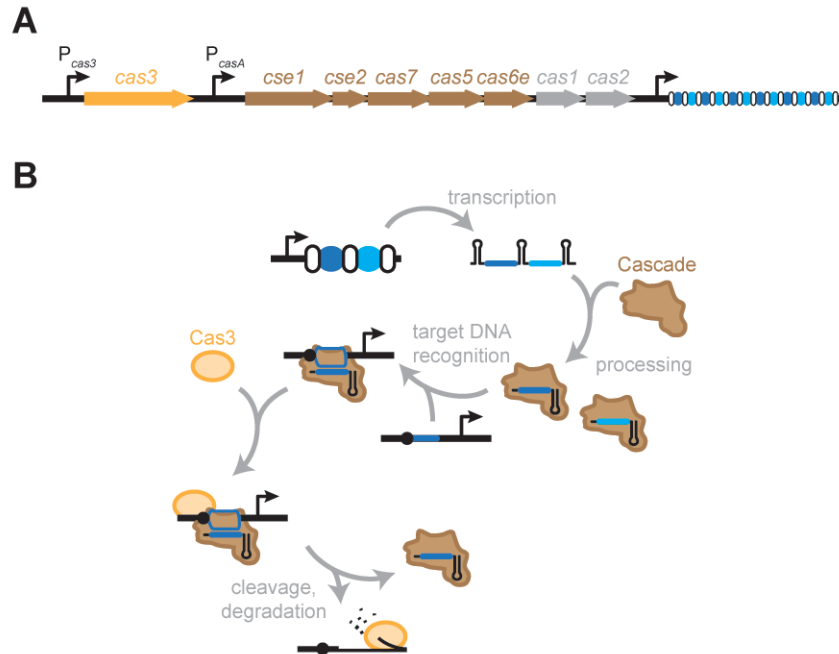

**Supplementary Figure S1.** The Type I-E CRISPR-Cas system in *E. coli* K-12. (A) Genetic locus of the Type I-E system. The *cas3* gene is located upstream of the *cse1-cse2-cas7-cas5-cas6e* operon encoding the Cascade protein complex. The two downstream genes *cas1* and *cas2* are involved in spacer acquisition. The native spacer array is composed of identical repeats (white ovals) and intervening spacers (blue circles). (B) Mechanism of DNA destruction based on previous work (1, 2). The transcribed array is processed into individual crRNAs by Cascade. The spacer portion of the array is then used to identify complementary DNA sequences flanked by a PAM (black circle). DNA binding leads to recruitment of Cas3, which cleaves and degrades the target DNA.

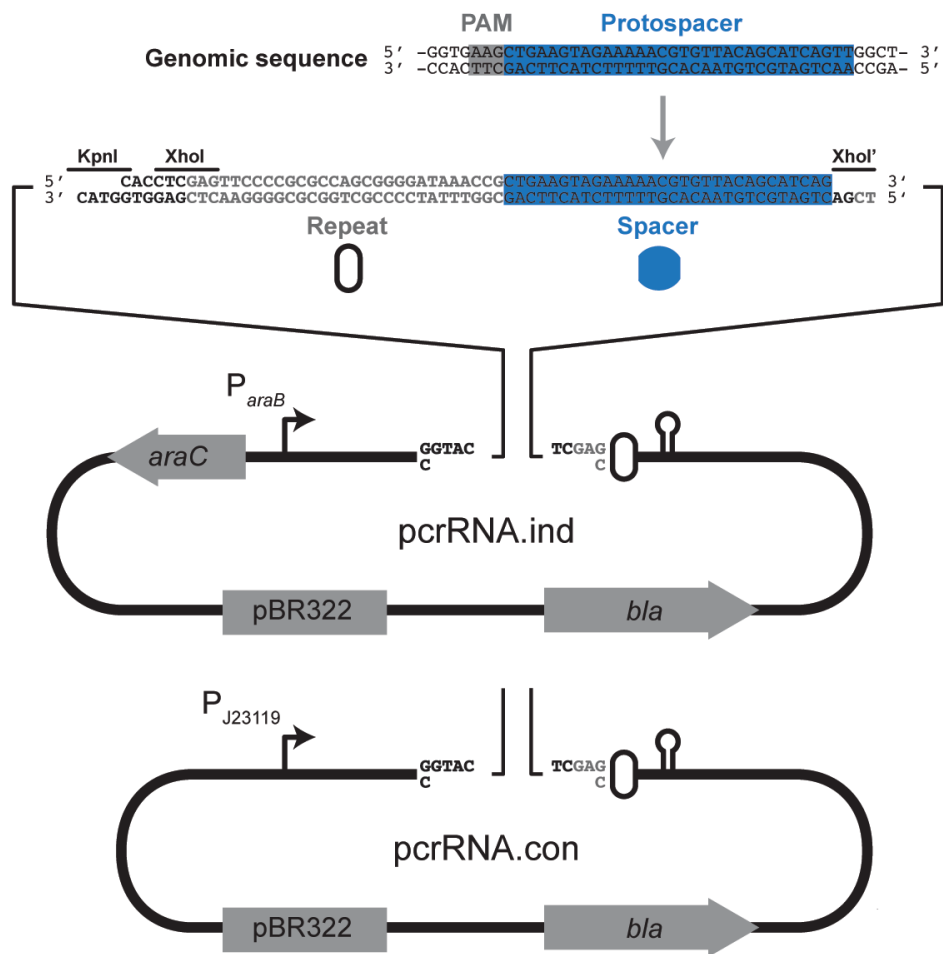

**Supplementary Figure S2.** Cloning scheme for the synthetic Type I-E CRISPR arrays. Following identification of a PAM in the target sequence, the downstream 32 base pairs serve as the protospacer. All but the last two base pairs are copied into two annealed oligonucleotides that, when annealed, form a repeat-spacer pair. The spacer-repeat pair contains the overhangs for a cleaved KpnI restriction site (left) and cleaved XhoI restriction site (right) along with an internal XhoI restriction site. As long as the 30<sup>th</sup> base in the protospacer is not a C, ligation of the annealed oligonucleotides into either plasmid digested with KpnI/XhoI disrupts the original XhoI restriction site. Consequently, additional repeat-spacer pairs can be sequentially inserted into the KpnI/XhoI restriction sites.

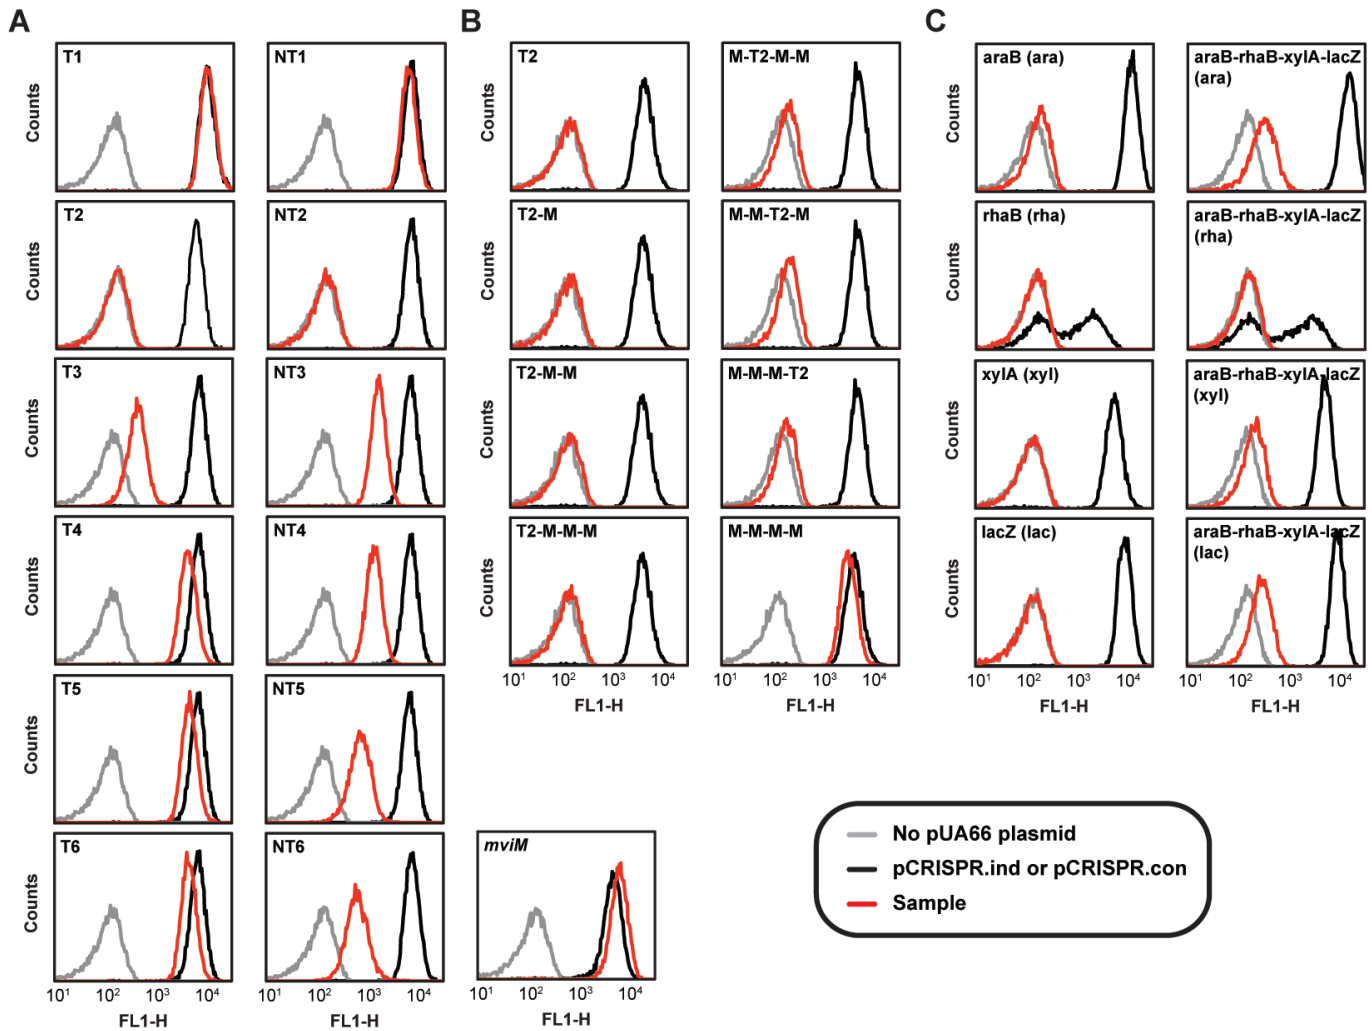

**Supplementary Figure S3.** Representative histograms from the flow cytometry analysis. **(A)** Histograms from Figure 2B. **(B)** Histograms from Figure 3. **(C)** Histograms for Figure 4B. The gray histograms are the no-GFP control for autofluorescence, the black histograms are the no-spacer plasmids (either pCRISPR.ind or pCRISPR.con), and the red histograms are the indicated single-spacer or multi-spacer plasmids. See the corresponding figure legend in the main text for more information. Sugars in parentheses were included in the growth medium. Note that the bimodal response to L-rhamnose was reported previously (3). Histograms are representative of independent experiments starting with three separate colonies.

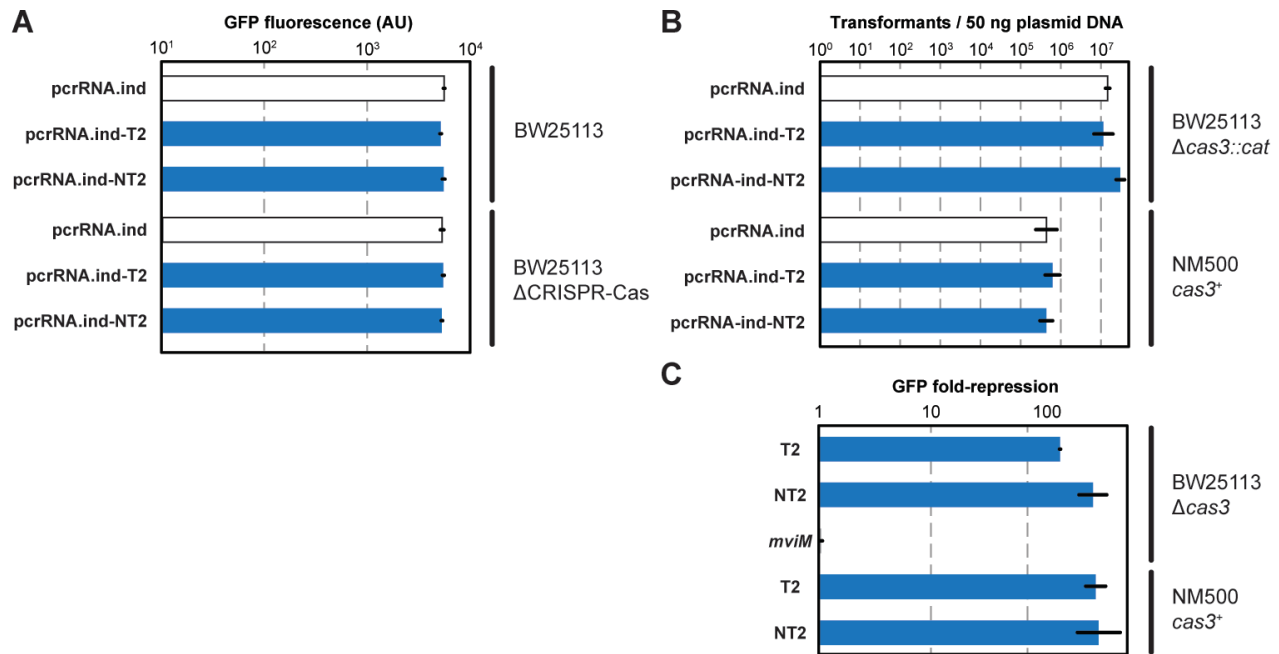

**Supplementary Figure S4.** GFP expression and DNA transformation in variants of the parent strain BW25113 or NM500. **(A)** GFP fluorescence of BW25113 (top) or BW25113  $\Delta$ CRISPR-Cas (bottom) harboring pUA66-lacZ and the indicated plasmid. Cells were grown for ~3-4 hours in M9 minimal medium containing 0.2% casamino acids, 0.4% glycerol, 0.2% L-arabinose, and 0.1 mM IPTG to  $ABS_{600} \sim 0.2$  prior to flow cytometry analysis. The reported values are the absolute fluorescence minus autofluorescence from cells lacking GFP. **(B)** Transformation efficiencies in the absence or presence of *cas3*. BW25113  $\Delta cas3::cat$  or NM500 *cas3*<sup>+</sup> cells were transformed with 50 ng of the indicated plasmid and plated on LB agar with ampicillin and kanamycin, and the number of colonies was counted. The differences in transformation efficiencies between strains may be attributed to switching cuvette manufacturers. **(C)** GFP repression following excision of the resistance cassette or in the presence of *cas3*. BW25113  $\Delta cas3$  or NM500 *cas3*<sup>+</sup> cells harboring pUA66-lacZ and pCRISPR.ind, pCRISPR.ind-T2 (T2), pCRISPR.ind-NT2 (NT2), or pCRISPR.ind-*mviM* (*mviM*) were grown as indicated in A. Repression is calculated as the ratio of the autofluorescence-subtracted fluorescence for pcrRNA.ind and each single-spacer plasmid. See Figure 2 for more information. Values represent the geometric mean and S.E.M. from independent experiments starting with three separate colonies.

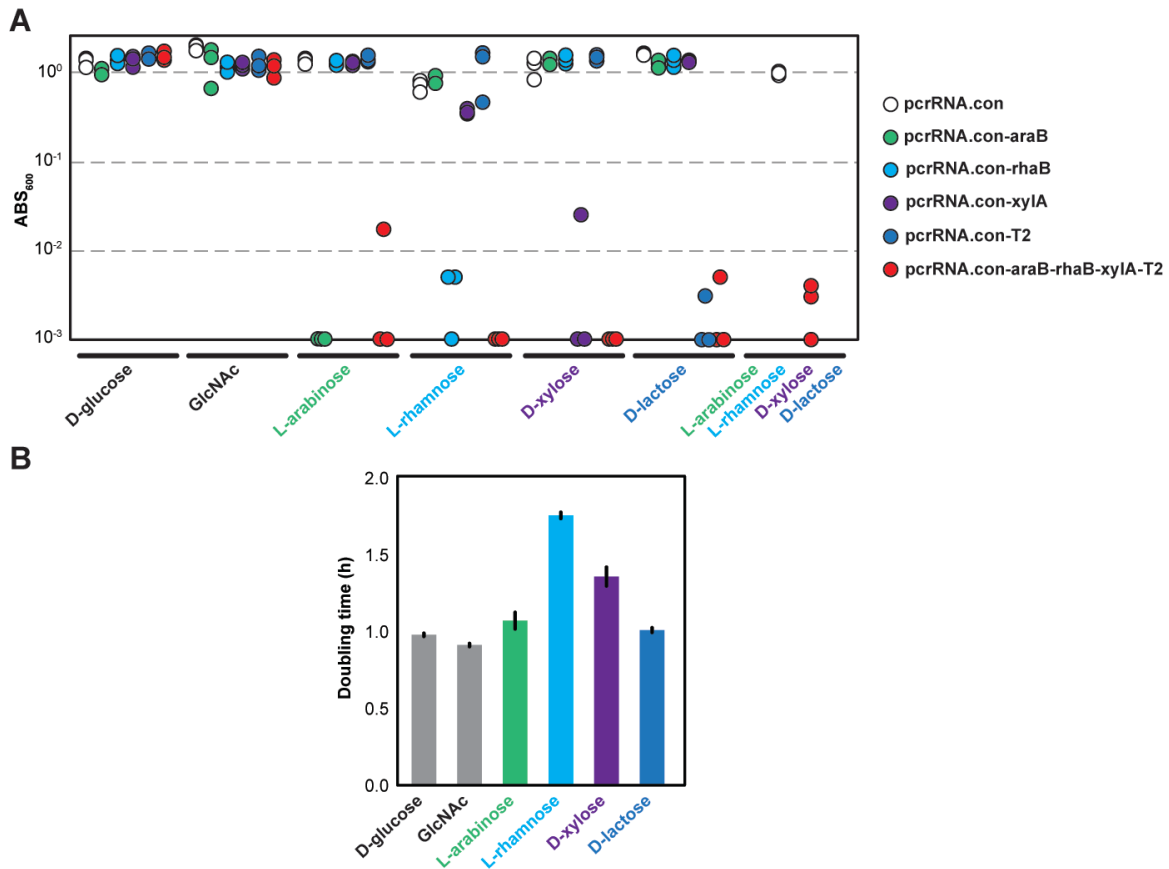

**Supplementary Figure S5.** Extended information for the growth assays. **(A)** Individual  $ABS_{600}$  values for the growth assays. Raw data values are reported. The data represent those shown in Figure 4D with the exception of the last column showing growth in media containing four sugars. Dots represent individual measurements from independent cultures. **(B)** Doubling times of MG1655  $\Delta cas3::cat$  cells harboring the constitutive pcrRNA.con plasmid grown in minimal medium with the indicated sugar as the sole carbon source. Values represent the geometric mean and S.E.M. from independent experiments starting with three separate colonies.

## SUPPLEMENTARY TABLES

**Supplementary Table S1.** Strains used in this work.

| Strains                             | Genotype                                                                                                                                                                   | Source                  | Stock # |
|-------------------------------------|----------------------------------------------------------------------------------------------------------------------------------------------------------------------------|-------------------------|---------|
| BW25113                             | <i>Escherichia coli</i> K12 F <sup>-</sup> DE( <i>araD-araB</i> )567 <i>lacZ</i> 4787(del)::rrnB-3) λ <sup>-</sup> <i>rph</i> -1 DE( <i>rhaD-rhaB</i> )568 <i>hsdR</i> 514 | CGSC <sup>a</sup> #7636 | pCB294  |
| BW25113 Δ <i>cas3</i> :: <i>cat</i> | BW25113 [Δ <i>cas3</i> P <sub><i>cse1</i></sub> ]::[ <i>cat</i> P <sub>J23119</sub> ]                                                                                      | This study              | pCB385  |
| BW25113 Δ <i>cas3</i>               | BW25113 [Δ <i>cas3</i> P <sub><i>cse1</i></sub> ]::[P <sub>J23119</sub> ]                                                                                                  | This study              | pCB400  |
| BW25113 ΔCRISPR-Cas                 | BW25113 [Δ <i>cas3-cse1-cse2-cas7-cas5-cas6e-CRISPR1</i> ]:: <i>cat</i>                                                                                                    | This study              | pCB401  |
| NM500 <i>cas3</i> <sup>+</sup>      | NM500 [ΔP <sub><i>cse1</i></sub> ]::[ <i>cat</i> P <sub>J23119</sub> ]                                                                                                     | This study              | pCB402  |
| MG1655                              | <i>Escherichia coli</i> K-12 F <sup>-</sup> λ <sup>-</sup> <i>ilvG</i> <sup>-</sup> <i>rfb</i> -50 <i>rph</i> -1                                                           | Storz lab (NIH)         | pCB1    |
| MG1655 Δ <i>cas3</i> :: <i>cat</i>  | MG1655 [Δ <i>cas3</i> P <sub><i>cse1</i></sub> ]::[ <i>cat</i> P <sub>J23119</sub> ]                                                                                       | This study              | pCB386  |

<sup>a</sup> CGSC: Coli genetic stock center (<http://cgsc.biology.yale.edu>).

**Supplementary Table S2.** Plasmids used in this work.

| <b>Plasmid</b> | <b>Description</b>                                       | <b>Resistance marker</b> | <b>Source</b>  | <b>Stock #</b> |
|----------------|----------------------------------------------------------|--------------------------|----------------|----------------|
| pUA66-lacZ     | <i>lacZ</i> promoter upstream of GFP                     | Kanamycin                | OpenBiosystems | pCB338         |
| pUA66-araB     | <i>araB</i> promoter upstream of GFP                     | Kanamycin                | OpenBiosystems | pCB208         |
| pUA66-xylA     | <i>xylA</i> promoter upstream of GFP                     | Kanamycin                | Ref. (3)       | pCB289         |
| pUA66-rhaB     | <i>rhaB</i> promoter upstream of GFP                     | Kanamycin                | Ref. (3)       | pCB292         |
| pBAD18         | L-arabinose-inducible plasmid with <i>araC</i> regulator | Ampicillin               | Ref. (3)       | pCB284         |
| pcrRNA.ind     | pBAD18 with single repeat                                | Ampicillin               | This study     | pCB359         |
| pcrRNA.ind-T1  | pcrRNA.ind with spacer T1                                | Ampicillin               | This study     | pCB360         |
| pcrRNA.ind-T2  | pcrRNA.ind with spacer T2                                | Ampicillin               | This study     | pCB361         |
| pcrRNA.ind-T3  | pcrRNA.ind with spacer T3                                | Ampicillin               | This study     | pCB362         |
| pcrRNA.ind-T4  | pcrRNA.ind with spacer T4                                | Ampicillin               | This study     | pCB363         |
| pcrRNA.ind-T5  | pcrRNA.ind with spacer T5                                | Ampicillin               | This study     | pCB364         |
| pcrRNA.ind-T6  | pcrRNA.ind with spacer T6                                | Ampicillin               | This study     | pCB365         |
| pcrRNA.ind-NT1 | pcrRNA.ind with spacer NT1                               | Ampicillin               | This study     | pCB366         |
| pcrRNA.ind-NT2 | pcrRNA.ind with spacer NT2                               | Ampicillin               | This study     | pCB367         |
| pcrRNA.ind-NT3 | pcrRNA.ind with spacer NT3                               | Ampicillin               | This study     | pCB368         |
| pcrRNA.ind-NT4 | pcrRNA.ind with spacer NT4                               | Ampicillin               | This study     | pCB369         |



**Supplementary Table S2.** Continued.

| <b>Plasmid</b>               | <b>Description</b>                                 | <b>Resistance marker</b> | <b>Source</b> | <b>Stock #</b> |
|------------------------------|----------------------------------------------------|--------------------------|---------------|----------------|
| pcrRNA.ind-NT5               | pcrRNA.ind with spacer NT5                         | Ampicillin               | This study    | pCB370         |
| pcrRNA.ind-NT6               | pcrRNA.ind with spacer NT6                         | Ampicillin               | This study    | pCB371         |
| pcrRNA.ind-LM                | pcrRNA.ind with spacers T2- <i>mviM</i>            | Ampicillin               | This study    | pCB372         |
| pcrRNA.ind-LMM               | pcrRNA.ind with spacers T2- <i>mviM-mviM</i>       | Ampicillin               | This study    | pCB373         |
| pcrRNA.ind-LMMM              | pcrRNA.ind with spacers T2- <i>mviM-mviM-mviM</i>  | Ampicillin               | This study    | pCB374         |
| pcrRNA.ind-MLMM              | pcrRNA.ind with spacers <i>mviM-T2-mviM-mviM</i>   | Ampicillin               | This study    | pCB375         |
| pcrRNA.ind-MMLM              | pcrRNA.ind with spacers <i>mviM-mviM-T2-mviM</i>   | Ampicillin               | This study    | pCB376         |
| pcrRNA.ind-MMML              | pcrRNA.ind with spacers <i>mviM-mviM-mviM-T2</i>   | Ampicillin               | This study    | pCB377         |
| pcrRNA.ind-MMMM              | pcrRNA.ind with spacers <i>mviM-mviM-mviM-mviM</i> | Ampicillin               | This study    | pCB378         |
| pcrRNA.ind-LLLL              | pcrRNA.ind with spacers T2-T2-T2-T2                | Ampicillin               | This study    | pCB403         |
| pcrRNA.con                   | pcrRNA.con with synthetic constitutive promoter    | Ampicillin               | This study    | pCB379         |
| pcrRNA.con-lacZ              | pcrRNA.con with spacer T2                          | Ampicillin               | This study    | pCB380         |
| pcrRNA.con-araB              | pcrRNA.con with spacer <i>araB</i>                 | Ampicillin               | This study    | pCB381         |
| pcrRNA.con-xylA              | pcrRNA.con with spacer <i>xylA</i>                 | Ampicillin               | This study    | pCB382         |
| pcrRNA.con-rhaB              | pcrRNA.con with spacer <i>rhaB</i>                 | Ampicillin               | This study    | pCB383         |
| pcrRNA.con-araB/rhaB/xylA/T2 | pcrRNA.con with spacers <i>araB-rhaB-xylA-T2</i>   | Ampicillin               | This study    | pCB384         |

**Supplementary Table S3. Oligonucleotides used in this work.**

| Name            | Sequence                                                                                    |
|-----------------|---------------------------------------------------------------------------------------------|
| J23119-pKD3.for | GCTAGCATTATACCTAGGACTGAGCTAGCTGTCAATCCATATGAATATCCTCCTTAG                                   |
| J23119-pKD3.rev | TGTAGGCTGGAGCTGCTT                                                                          |
| HR-cas3.for     | TACAATTAACCTATACATATATTAAGATGTGTTGAATTGTGCTAGCATTATACCTAGGAC                                |
| HR-cas3.rev     | TGATATCATCGATAATACTAAAAAACAGGGAGGCTATTATGTAGGCTGGAGCTGCTT                                   |
| HR-CRISPR.for   | ACCGCAGAGGCGGGGAACTCCAAGTGATATCCATCATTCCATATGAATATCCTCCTTAG                                 |
| HR-casA.rev     | CTTTTAATTTCCCGGTATGAGATTTTATATTCACAGTATGTGTAGGCTGGAGCTGCTT                                  |
| pcrRNA.ind.for  | CCACCTCGAGTTCCCCGCGCCAGCGGGGATAAACCGAAAAAAAAACCCCGCCCTGACAGG<br>GCGGGGTTTTTTTTTA            |
| pcrRNA.ind.rev  | AAGCTTAAAAAAAAACCCCGCCCTGTCAGGGGCGGGTTTTTTTTTTTCGGTTTATCCCCGCTG<br>GCGCGGGGAACTCGAGGTGGTACC |
| pcrRNA.con.for  | TTTGACAGCTAGCTCAGTCCTAGGTATAATGCTAGCG                                                       |
| pcrRNA.con.rev  | CTAGCGCTAGCATTATACCTAGGACTGAGCTAGCTGTCAAATGCA                                               |
| T2.for          | CACCTCGAGTTCCCCGCGCCAGCGGGGATAAACCGCTTTACACTTTATGCTTCCGGCTCGT<br>ATGT                       |
| T2.rev          | TCGAACATACGAGCCGGAAGCATAAAGTGTAAGCGGTTTATCCCCGCTGGCGCGGGGAAC<br>TCGAGGTGGTAC                |
| NT2.for         | CACCTCGAGTTCCCCGCGCCAGCGGGGATAAACCGCATAAAGTGTAAGCCTGGGGTGCTT<br>AATG                        |
| NT2.rev         | TCGACATTAGGCACCCCAGGCTTTACACTTTATGCGGTTTATCCCCGCTGGCGCGGGGAAC<br>TCGAGGTGGTAC               |
| T3.for          | CACCTCGAGTTCCCCGCGCCAGCGGGGATAAACCGAAACAGCTATGACCATGATTACGGAT<br>TCAC                       |
| T3.rev          | TCGAGTGAATCCGTAATCATGGTCATAGCTGTTTCGGTTTATCCCCGCTGGCGCGGGGAAC<br>TCGAGGTGGTAC               |
| NT3.for         | CACCTCGAGTTCCCCGCGCCAGCGGGGATAAACCGGCGATTAAGTTGGGTAACGCCAGGGT<br>TTTC                       |
| NT3.rev         | TCGAGAAAACCCTGGCGTTACCCAACTTAATCGCCGGTTTATCCCCGCTGGCGCGGGGAAC<br>TCGAGGTGGTAC               |

**Supplementary Table S3. Continued.**

| Name    | Sequence                                                                       |
|---------|--------------------------------------------------------------------------------|
| T1.fwd  | CACCTCGAGTTCCCCGCGCCAGCGGGGATAAACCGCCCTTTCGTCTTCACACTCGAGCAGACAG               |
| T1.rev  | TCGACTGTCGTGCTCGAGTGTGAAGACGAAAGGGCGGTTTATCCCCGCTGGCGCGGGGA<br>ACTCGAGGTGGTAC  |
| T4.for  | CACCTCGAGTTCCCCGCGCCAGCGGGGATAAACCGAGATATACATATGAGTAAAGGAGA<br>AGAACT          |
| T4.rev  | TCGAAGTTCTTCTCCTTTACTCATATGTATATCTCGGTTTATCCCCGCTGGCGCGGGGA<br>ACTCGAGGTGGTAC  |
| T5.for  | CACCTCGAGTTCCCCGCGCCAGCGGGGATAAACCGTGATGCAACATACGGAAAACCTTAC<br>CCTTAA         |
| T5.rev  | TCGATTAAGGGTAAGTTTTCCGTATGTTGCATCACGGTTTATCCCCGCTGGCGCGGGGA<br>ACTCGAGGTGGTAC  |
| T6.for  | CACCTCGAGTTCCCCGCGCCAGCGGGGATAAACCGTGATACCCTTGTTAATAGAATCGA<br>GTTAAA          |
| T6.rev  | TCGATTTAACTCGATTCTATTAACAAGGGTATCACGGTTTATCCCCGCTGGCGCGGGGA<br>ACTCGAGGTGGTAC  |
| NT1.for | CACCTCGAGTTCCCCGCGCCAGCGGGGATAAACCGACGAAAGGGCCTCGTGATACGCCT<br>ATTTTT          |
| NT1.rev | TCGAAAAAATAGGCGTATCACGAGGCCCTTTCGTGCGGTTTATCCCCGCTGGCGCGGGGA<br>ACTCGAGGTGGTAC |
| NT4.for | CACCTCGAGTTCCCCGCGCCAGCGGGGATAAACCGTTCTTCTCCTTTACTCATATGTAT<br>ATCTCC          |
| NT4.rev | TCGAGGAGATATACATATGAGTAAAGGAGAAGAACGGTTTATCCCCGCTGGCGCGGGGA<br>ACTCGAGGTGGTAC  |
| NT5.for | CACCTCGAGTTCCCCGCGCCAGCGGGGATAAACCGTAAGTTTTCCGTATGTTGCATCA<br>CCTTCA           |
| NT5.rev | TCGATGAAGGTGATGCAACATACGGAAAACCTACCGGTTTATCCCCGCTGGCGCGGGGA<br>ACTCGAGGTGGTAC  |
| NT6.for | CACCTCGAGTTCCCCGCGCCAGCGGGGATAAACCGGTATCACCTTCAAACCTTGACTTCA<br>GCACGT         |
| NT6.rev | TCGAACGTGCTGAAGTCAAGTTTGAAGGTGATACCGGTTTATCCCCGCTGGCGCGGGGA<br>ACTCGAGGTGGTAC  |

**Supplementary Table S3. Continued.**

| <b>Name</b>   | <b>Sequence</b>                                                                |
|---------------|--------------------------------------------------------------------------------|
| araB.fwd      | CACCTCGAGTTCCCCGCGCCAGCGGGGATAAACCGATTAGCGGATCCTACCTGACGCTT<br>TTTATC          |
| araB.rev      | TCGAGATAAAAAGCGTCAGGTAGGATCCGCTAATCGGTTTATCCCCGCTGGCGCGGGGA<br>ACTCGAGGTGGTAC  |
| xylA.for      | CACCTCGAGTTCCCCGCGCCAGCGGGGATAAACCGGAGTGCCCAATATTACGACATCAT<br>CCATCA          |
| xylA.rev      | TCGATGATGGATGATGTCGTAATATTGGGCACTCCGTTTATCCCCGCTGGCGCGGGGA<br>ACTCGAGGTGGTAC   |
| rhaB.for      | CACCTCGAGTTCCCCGCGCCAGCGGGGATAAACCGGTCGCGAATTCAGGCGCTTTTTAG<br>ACTGGT          |
| rhaB.rev      | TCGAACCAGTCTAAAAAGCGCCTGAATTCGCGACCGGTTTATCCCCGCTGGCGCGGGGA<br>ACTCGAGGTGGTAC  |
| mviM.for      | CACCTCGAGTTCCCCGCGCCAGCGGGGATAAACCGAGCGGGCAGGGTATTCTCATCA<br>AACCCA            |
| mviM.rev      | TCGATGGGTTTGATGAGAATACCCTGCCCCGCGCTCGGTTTATCCCCGCTGGCGCGGGGA<br>ACTCGAGGTGGTAC |
| lacZ-qPCR.fwd | CGGCGTATCGCCAAAATCAC                                                           |
| lacZ-qPCR.rev | ATGGGTAACAGTCTTGCGCG                                                           |
| araB-qPCR.fwd | TACCAGTGC GTTAGGCTGTG                                                          |
| araB-qPCR.rev | CTGGACCCGATCCTCAATCG                                                           |
| xylA-qPCR.fwd | CGCCCCACAGGACATAGTTT                                                           |
| xylA-qPCR.rev | GGAACGGCCAAC TGCTTTAC                                                          |
| rhaB-qPCR.fwd | TCACTTCCGGGATCGGTTG                                                            |
| rhaB-qPCR.rev | TTCAGCGAGTGCTTCAGGAG                                                           |

**Supplementary Table S4.** Protospacers in this work.

| Spacer name              | Target strand <sup>a</sup> | Distance from TSS <sup>b</sup> | Protospacer sequence <sup>c</sup>          |
|--------------------------|----------------------------|--------------------------------|--------------------------------------------|
| T1                       | T                          | -141                           | <b>AGG</b> CCCTTTCGTCTTCACaCTCGAGCACGACAG  |
| T2/lacZ                  | T                          | -37                            | <b>AGG</b> CTTTACACTTTATGCTTCCGGCTCGTATGT  |
| T3                       | T                          | +27                            | <b>AGG</b> AAACAGCTATGACCATGATTACGGATTAC   |
| T4                       | T                          | +149                           | <b>AGG</b> AGATATACATATGAGTAAAGGAGAAGAACT  |
| T5                       | T                          | +263                           | <b>AGG</b> TGATGCAACATACGAAAACTTACCCTTAA   |
| T6                       | T                          | +506                           | <b>AGG</b> TGATACCCTTGTTAATAGAATCGAGTTAAA  |
| NT1                      | N                          | -129                           | <b>AAG</b> ACGAAAGGGCCTCGTGATACGCCATTTTTT  |
| NT2                      | N                          | -20                            | <b>AAG</b> CATAAAGTGTAAGCCTGGGGTGCCTAATG   |
| NT3                      | N                          | +119                           | <b>AAG</b> GCGATTAAGTTGGGTAACGCCAGGGTTTTTC |
| NT4                      | N                          | +180                           | <b>AAG</b> TTCTTCTCCTTTACTCATATGTATATCTCC  |
| NT5                      | N                          | +290                           | <b>AGG</b> GTAAGTTTTCCGTATGTTGCATCACCTTCA  |
| NT6                      | N                          | +515                           | <b>AGG</b> GTATCACCTTCAAACCTTGACTTCAGCACGT |
| <i>araB</i>              | T                          | -53                            | <b>AAG</b> ATTAGCGGATCCTACCTGACGCTTTTTTATC |
| <i>xylA</i>              | T                          | -19                            | <b>AGG</b> GAGTGCCCAATATTACGACATCATCCATCA  |
| <i>rhaB</i>              | T                          | -33                            | <b>AAG</b> TCGCGAATTCAGGCGCTTTTTTAGACTGGT  |
| <i>mviM</i> <sup>d</sup> | N/A                        | N/A                            | <b>AAG</b> AGCGCGGGCAGGGTATTCTCATCAAACCCA  |

- Characteristics of the target strand, which is complementary to the spacer: T, template strand of gene; N, non-template strand of the gene.
- Distance from the transcriptional start site (TSS) to the closest end of the PAM. Negative and positive values are upstream and downstream of the TSS, respectively.
- PAMs are in bold red lettering. CRISPR spacers were designed to match the protospacer sequence.
- Targets a protospacer in *Salmonella typhimurium* LT2 and has been shown to be non-targeting in *E. coli*(4).

Supplementary Table S5. Promoter sequences.

| Promoter    | Sequence <sup>a</sup>                                                                                                                                                                                                                                                                                                                                                                                                                                                                                                                                                                                   |
|-------------|---------------------------------------------------------------------------------------------------------------------------------------------------------------------------------------------------------------------------------------------------------------------------------------------------------------------------------------------------------------------------------------------------------------------------------------------------------------------------------------------------------------------------------------------------------------------------------------------------------|
| <i>lacZ</i> | CTTTCGTCTTCACACTCGAGCACGACAGGTTTTCCCGACTGGAAAGCGGGCAGTGAGC<br>GCAACGCAATTAATGTGAGTTAGCTCACTCATTAGGCACCCAGGCTTTACACTTTA<br>TGCTTCCGGCTCGTATGTTGTGTGG <b>A</b> ATTGTGAGCGGATAACAATTTACACACAGGAA<br>ACAGCTATGACCATGATTACGGATTCACTGGCCGTCGTTTTACAACGTCGTGACTGG<br>GAAAACCCTGGCGTTACCCAACCTAATCGCCTTGACGACAGGATCCTCTAGATTTA<br>AGAA                                                                                                                                                                                                                                                                          |
| <i>araB</i> | CCTGTCTCTTGATCAGATCTGGCCTCAATCGGCGTTAAACCCGCCACCAGATGGGCG<br>TTAAACGAGTATCCCGGCAGCAGGGGATCATTTTGCGCTTCAGCCATACTTTTCATA<br>CTCCCACCATTACAGAGAAGAAACCAATTGTCCATATTGCATCAGACATTGCCGTCAC<br>TGCGTCTTTTACTGGCTCTTCTCGCTAACCCAACCGGTAACCCCGCTTATTTAAAGC<br>ATTCTGTAACAAAGCGGGACCAAAGCCATGACAAAAACGCGTAACAAAAGTGTCTAT<br>AATCACGGCAGAAAAGTCCACATTGATTATTTGCACGGCGTCACACTTTGCTATGCC<br>ATAGCATTTTTATCCATAAGATTAGCGGATCCTACCTGACGCTTTTTATCGCAACTC<br>TCTACTGTTTCTCCAT <b>A</b> CCCGTTTTTTTTGGATGGAGTGAAACGATGGCGATTGCAAT<br>TGGCCTCGATTTTGGCAGTGATTCTGTGCGAGCTTTGGCGGTGGACTGCGCTACCG<br>TGAAGCTCGAGGGGATCCTCTAGA |
| <i>xyIA</i> | CGAGGCCCTTTCGTCTTCACGGTGTAGGGCCTTCTGTAGTTAGAGGACAGTTTTAAT<br>AAGTAACAATCACCGCGATAAACGTAACCAATTTTTAGCAACTAAACAGGGGAAAAC<br>AATTACAGATTTTTATCTTTTCGATTACGATTTTTGGTTTATTTCTTGATTTATGACC<br>GAGATCTTACTTTTGTGCGCAATTGTACTTATTGCATTTTTCTCTTCGAGGAATTA<br>CCCAGTTTCATCATTCCATTTTATTTTGGCAGCGAGCGCACACTTGTGAATTATCTC<br>AATAGCAGTGTGAAATAACATAATTGAGCAACTGAAAGGGAGTGCCCAATATTACGA<br>C <b>A</b> TTCATCCATCACCCGCGGCATTACCTGATTATGGAGTTCAATATGCAAGCCTATTT<br>TGACCAGCTCGATCGCGTTCGTTATGAAGGCTCAAAATCCTCAAACCCGTTAGCATT<br>CCGTCACTACAATCCCAGCAACTGGTGTGGGTAAGCGTATGTAATCTAGATTTAA<br>GAAGGAGAT                  |
| <i>rhaB</i> | CCTGTCTCTTGATCAGATCTGTTCTATCGCCACGGACGCGTTACCAGACGGAAAAAA<br>ATCCACACTATGTAATACGGTCATACTGGCCTCCTGATGTCGTCAACACGGCGAAAT<br>AGTAATCACGAGGTCAGGTTCTTACCTTAAATTTTCGACGGAAAACCACGTAAAAAA<br>CGTCGATTTTTCAAGATACAGCGTGAATTTTCAGGAAATGCGGTGAGCATCACATCA<br>CCACAATTCAGCAAATGTGAACATCATCACGTTTCATCTTTCCCTGGTTGCCAATGG<br>CCCATTTTCCCTGTCAGTAACGAGAAGGTCGCGAATTCAGGCGCTTTTTAGACTGGTC<br>GT <b>A</b> ATGAAATTCAGCAGGATCACATTATGACCTTTTCGCAATTGTGTGCGCGTCGATC<br>TCGGCGCATCCAGTGGGCGCGTGATGCTGGCGCGTTACGAGCGTGAATGGGATCCTC<br>TAGATTTAAGAA                                                                         |

a) Sequences highlighted in gray are from pUA66, indicating where each promoter was inserted into the plasmid. The underlined and bolded base is the previously mapped transcriptional start site.

## SUPPLEMENTARY REFERENCES

1. Hochstrasser, M.L., Taylor, D.W., Bhat, P., Guegler, C.K., Sternberg, S.H., Nogales, E. and Doudna, J.A. (2014) CasA mediates Cas3-catalyzed target degradation during CRISPR RNA-guided interference. *Proc. Natl. Acad. Sci. U. S. A.*, **111**, 6618–6623.
2. Brouns, S.J.J., Jore, M.M., Lundgren, M., Westra, E.R., Slijkhuis, R.J.H., Snijders, A.P.L., Dickman, M.J., Makarova, K.S., Koonin, E.V. and van der Oost, J. (2008) Small CRISPR RNAs guide antiviral defense in prokaryotes. *Science*, **321**, 960–964.
3. Afroz, T., Biliouris, K., Kaznessis, Y. and Beisel, C.L. (2014) Bacterial sugar utilization gives rise to distinct single-cell behaviors. *Mol. Microbiol.*, **93**, 1093–1103.
4. Gomaa, A.A., Klumpe, H.E., Luo, M.L., Selle, K., Barrangou, R. and Beisel, C.L. (2014) Programmable removal of bacterial strains by use of genome-targeting CRISPR-Cas systems. *mBio*, **5**, e00928–00913.
